# Supplementary material for: Human Endometrial Fibroblasts Derived from Mesenchymal Progenitors Inherit Progesterone Resistance and Acquire an Inflammatory Phenotype in the Endometrial Niche in Endometriosis
Source: PubMed Central journal article supplement — Biol Reprod. 2016 Apr 13;94(5):118. doi: 10.1095/biolreprod.115.136010 (PMC4939744; doi:10.1095/biolreprod.115.136010), 2016-04-13
Supplement: supp_115.136010_biolreprod.115.136010-1.pdf [file supp_115.136010_biolreprod.115.136010-1.pdf]

**Supplemental Table S1. Subject characteristics**

| <b><u>Sample ID</u></b> | <b><u>Study</u></b> | <b><u>Age</u></b> | <b><u>Cycle Phase</u></b> | <b><u>Diagnosis</u></b>                                                    |
|-------------------------|---------------------|-------------------|---------------------------|----------------------------------------------------------------------------|
| ETB99                   | ELISA               | 24                | Proliferative             | Volunteer Natural Cycle Biopsy                                             |
| ETB65                   | Microarray          | 29                | Proliferative             | Volunteer Natural Cycle Biopsy                                             |
| ETB117                  | ELISA               | 24                | Proliferative             | Volunteer Natural Cycle Biopsy                                             |
| ETB116                  | Microarray          | 27                | Proliferative             | Volunteer Natural Cycle Biopsy                                             |
| ETB100                  | Microarray          | 31                | Proliferative             | Volunteer Natural Cycle Biopsy                                             |
| ETB88                   | ELISA               | 24                | Early Secretory           | Oocyte Donor                                                               |
| ETB61                   | Microarray          | 26                | Interval                  | Oocyte Donor                                                               |
| ETB128                  | Microarray          | 21                | Early Secretory           | Oocyte donor                                                               |
| ETB125                  | Microarray          | 28                | Early Secretory           | Oocyte donor                                                               |
| ETB109                  | Microarray          | 28                | Interval                  | Oocyte Donor                                                               |
| UC249                   | Microarray/ELISA    | 47                | Proliferative             | Uterine Fibroids, Ovarian Hemorrhagic Cyst                                 |
| UC209                   | Microarray          | 41                | Proliferative             | Uterine Fibroids, Endometrial Polyp, Adenomyosis, Ovarian Hemorrhagic Cyst |
| UC235                   | ELISA               | 47                | Proliferative             | Uterine Fibroids                                                           |
| LA22                    | Microarray/ELISA    | 36                | Proliferative             | Endometriosis Minimal (I), Endometrial Polyp                               |
| FT08                    | Microarray          | 35                | Proliferative             | Endometriosis Severe (IV)                                                  |
| LA55                    | Microarray/ELISA    | 29                | Proliferative             | Endometriosis Severe (IV), Uterine Fibroids                                |
| LA07                    | Microarray          | 49                | Proliferative             | Endometriosis Severe (IV)                                                  |
| ST185                   | Microarray          | 39                | Proliferative             | Endometriosis Severe (IV), Adenomyosis                                     |
| LA36                    | Microarray          | 31                | Proliferative             | Endometriosis Severe (IV)                                                  |
| LA34                    | Microarray/ELISA    | 26                | Proliferative             | Endometriosis Mild (II)                                                    |
| UC152                   | Microarray          | 50                | Proliferative             | Endometriosis Moderate (III), Ovarian Serous Cyst, Endometrial Polyp       |
