# Supplementary material for: Human Endometrial Fibroblasts Derived from Mesenchymal Progenitors Inherit Progesterone Resistance and Acquire an Inflammatory Phenotype in the Endometrial Niche in Endometriosis
Source: PubMed Central journal article supplement — Biol Reprod. 2016 Apr 13;94(5):118. doi: 10.1095/biolreprod.115.136010 (PMC4939744; doi:10.1095/biolreprod.115.136010), 2016-04-13
Supplement: supp_115.136010_biolreprod.115.136010-4.pdf [file supp_115.136010_biolreprod.115.136010-4.pdf]

**Supplemental Table S3.** Lineage-associated Gene Expression Validation: Microarray-Q-RT-PCR Correlation.Spearman's  $\rho=0.483$ ,  $p=0.0004$ Kendall's  $\tau=0.35$ ,  $p=0.0002$ **A. eMSC Lineage In Vivo****eMSC FACS.control vs eSF FACS.control**

| Gene symbol | Array FC | Q-RT-PCR FC |
|-------------|----------|-------------|
| ANGPT2      | 25.5     | 276.9       |
| BMP8A       | 5.8      | 94.7        |
| CDH6        | 14.3     | 234.4       |
| FRZB        | 8.3      | 15.6        |
| GJA4        | 8.4      | 798.1       |
| HEYL        | 4.5      | 8.8         |
| HIGD1B      | 14.8     | 2081.6      |
| IL6R        | 2.5      | 2.1         |
| JAG1        | 8.3      | 21.0        |
| MCAM        | 11.2     | 145.6       |
| NOTCH1      | 2.6      | 3.6         |
| PDE1A       | 8.7      | 39.2        |
| PDE3A       | 7.6      | 5.1         |
| RGS5        | 39.2     | 17.1        |
| SLIT2       | 6.2      | 28.7        |
| SLIT3       | 2.9      | 7.7         |

**B. eSF Lineage In Vivo****eSF FACS.control vs eMSC FACS.control**

| Gene symbol | Array FC | Q-RT-PCR FC |
|-------------|----------|-------------|
| DIO2        | 4.0      | 3.8         |
| FGF7        | 4.0      | 8.3         |
| FGF9        | 4.9      | 121.0       |
| PDGFD       | 4.5      | 6.2         |
| ROBO2       | 3.0      | 290.7       |
| WNT2        | 3.9      | 6.2         |
| WNT5A       | 2.9      | 3.5         |

**C. eSF Lineage In Vitro****eSF Late.control vs eMSC FACS.control**

| Gene symbol | Array FC | Q-RT-PCR FC |
|-------------|----------|-------------|
| CALB2       | 5.1      | 2.9         |
| CDH2        | 8.7      | 6.7         |

|         |      |       |
|---------|------|-------|
| FGF7    | 7.5  | 17.6  |
| FGF9    | 3.4  | 163.2 |
| GJA1    | 6.9  | 3.3   |
| GREB1L  | 2.2  | 15.3  |
| IL13RA1 | 3.0  | 5.5   |
| IL13RA2 | 2.1  | 15.5  |
| LCP1    | 2.0  | 2.4   |
| LOX     | 21.6 | 11.1  |
| MME     | 8.6  | 2.5   |
| PDGFC   | 6.3  | 12.1  |
| PDGFD   | 5.2  | 6.3   |
| PDGFRA  | 7.3  | 5.6   |
| ROBO2   | 3.2  | 193.6 |
| TOX     | 2.9  | 5.4   |
| TRIP11  | 2.7  | 2.8   |
| VEGFC   | 4.3  | 9.9   |

#### D. eMSC Differentiation In Vitro

##### eMSC Late.control vs eMSC FACS.control

| Gene symbol | Array FC | Q-RT-PCR FC |
|-------------|----------|-------------|
| ASAM        | 3.8      | 11.1        |
| CDH2        | 7.4      | 16.1        |
| FGF7        | 6.2      | 8.9         |
| FGF9        | 4.1      | 212.0       |
| GJA1        | 5.9      | 12.3        |
| LOX         | 19.3     | 6.0         |
| PDGFD       | 4.5      | 8.5         |
| TOX         | 3.5      | 14.9        |
| VEGFC       | 4.2      | 27.2        |

##### eMSC Late.control vs eSF FACS.control

| Gene symbol | Array FC | Q-RT-PCR FC |
|-------------|----------|-------------|
| CXCL2       | -2.9     | -21.007     |
| HEYL        | -2.7     | -305.345    |
| IL8         | -2.1     | -30.138     |
| SLIT3       | -2.8     | -8.446      |

eMSC = endometrial mesenchymal stem cells; eSF = endometrial stromal fibroblasts; control = no endometriosis; FC= fold change; Q-RT-PCR= quantitative reverse transcription polymerase chain reaction.
